# Supplementary material for: Molecular insights into the temperature and pressure dependence of mechanical behavior and dynamics of Na-montmorillonite clay
Source: Royal Society of Chemistry journal article supplement (doi:10.1039/d3na00365e), 2023-01-01
Supplement: d3na00365e1.pdf [file d3na00365e1.pdf]

*Supporting Information for*

**Molecular Insights into the Temperature and Pressure Dependence of Mechanical  
Behavior and Dynamics of Na-Montmorillonite Clay**

Sarah Ghazanfari<sup>1</sup>, Amirhadi Alesadi<sup>1</sup>, Yangchao Liao<sup>1</sup>,

Yida Zhang<sup>2</sup>, Wenjie Xia<sup>1,2\*</sup>

<sup>1</sup> Department of Civil, Construction, Environmental Engineering, North Dakota State University,  
Fargo, ND 58108, United States

<sup>2</sup> Department of Civil, Environmental, Architectural Engineering, University of Colorado  
Boulder, Boulder, CO 80309, United States

<sup>3</sup> Department of Aerospace Engineering, Iowa State University, Ames, IA 50011, United States

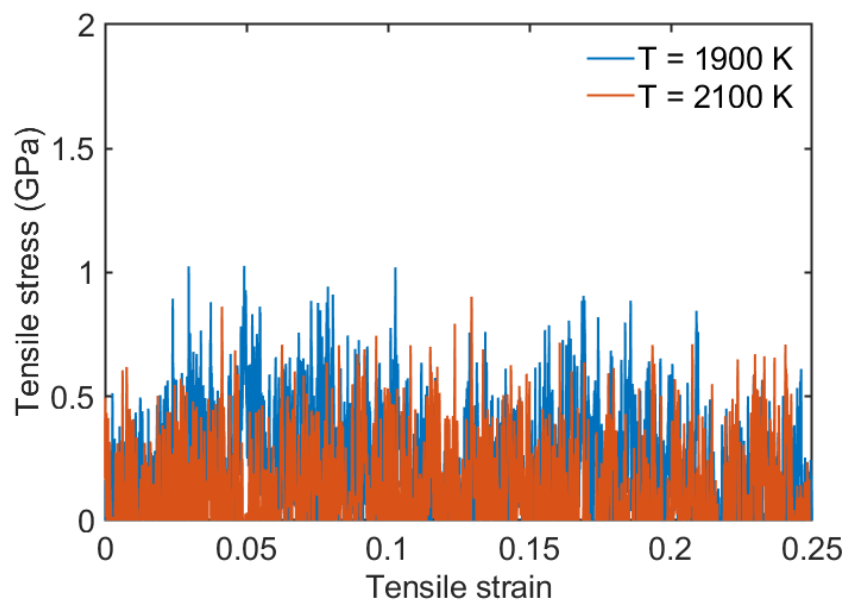

**Figure S1.** Tensile test for temperatures out of selected range when the pressure is 1000 atm.

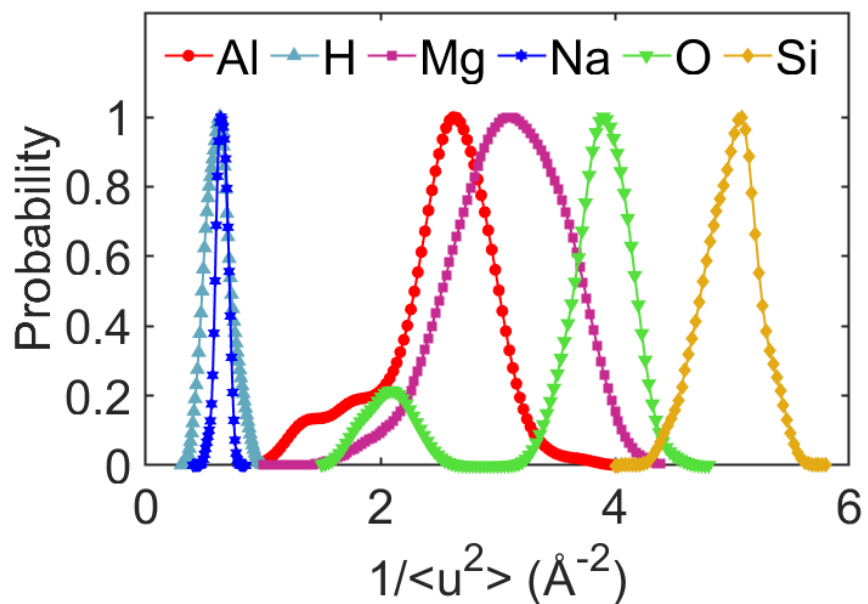

**Figure S2.** Probability distribution of local molecular stiffness  $1/\langle u^2 \rangle$  of the Na-MMT system for different atom types undergoing zero pressure and 1700 K temperature.

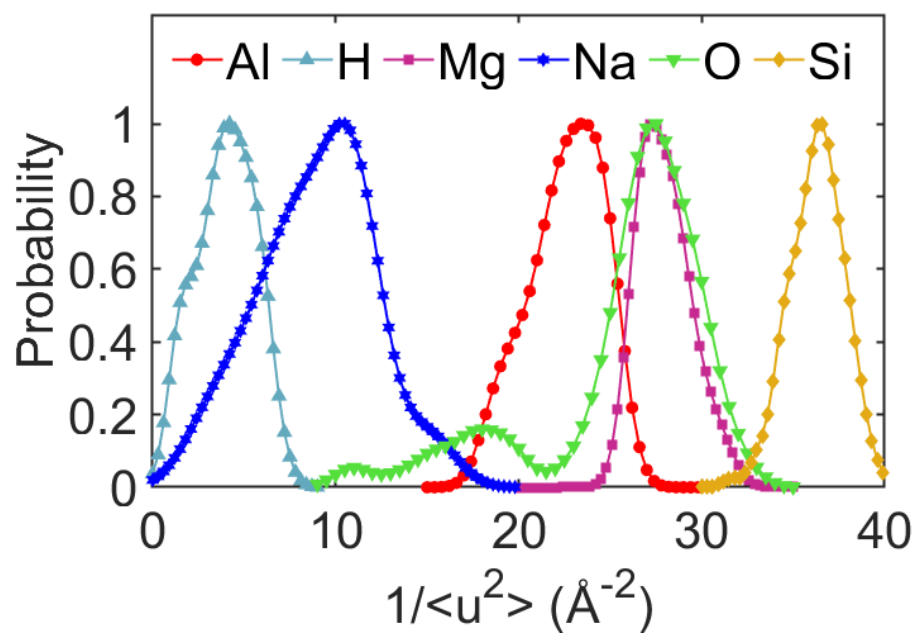

**Figure S3.** Probability distribution of local molecular stiffness  $1/\langle u^2 \rangle$  of the Na-MMT system for different atom types undergoing 1000 atm pressure and 300 K temperature.
